# Supplementary material for: Lactobacillus rhamnosus GG alleviates β-conglycinin-induced allergy by regulating the T cell receptor signaling pathway
Source: Royal Society of Chemistry journal article supplement (doi:10.1039/d0fo02124e), 2020-01-01
Supplement: d0fo02124e1.pdf [file d0fo02124e1.pdf]

## Supplementary Material for

### *Lactobacillus rhamnosus* GG alleviates $\beta$ -conglycinin induced allergy by regulating the T cell receptor signaling pathway

Xiaoxu Chen, XiuLi Zhao, Yaozhong Hu, Bowei Zhang, Yan Zhang, and Shuo Wang

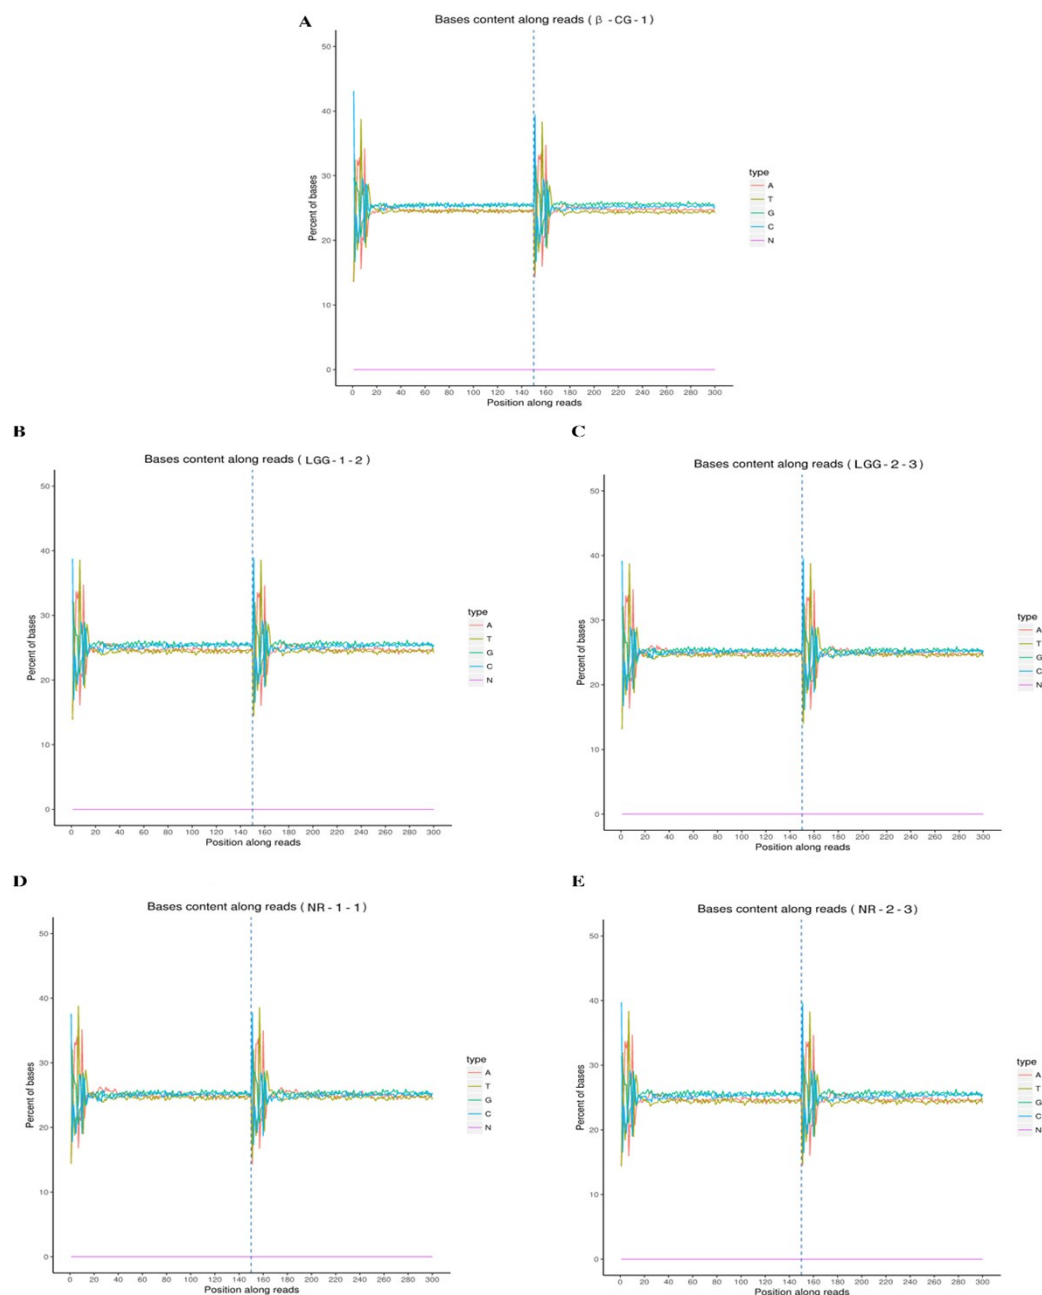

**Figure S1** GC content distribution diagram. (A) Distribution of GC content in  $\beta$ -CG group. (B) Distribution of GC content in LGG-1 group. (C) Distribution of GC content in LGG-2 group. (D) Distribution of GC content in NR-1 group. (E) Distribution of GC content in NR-2 group.

Pearson correlation between samples

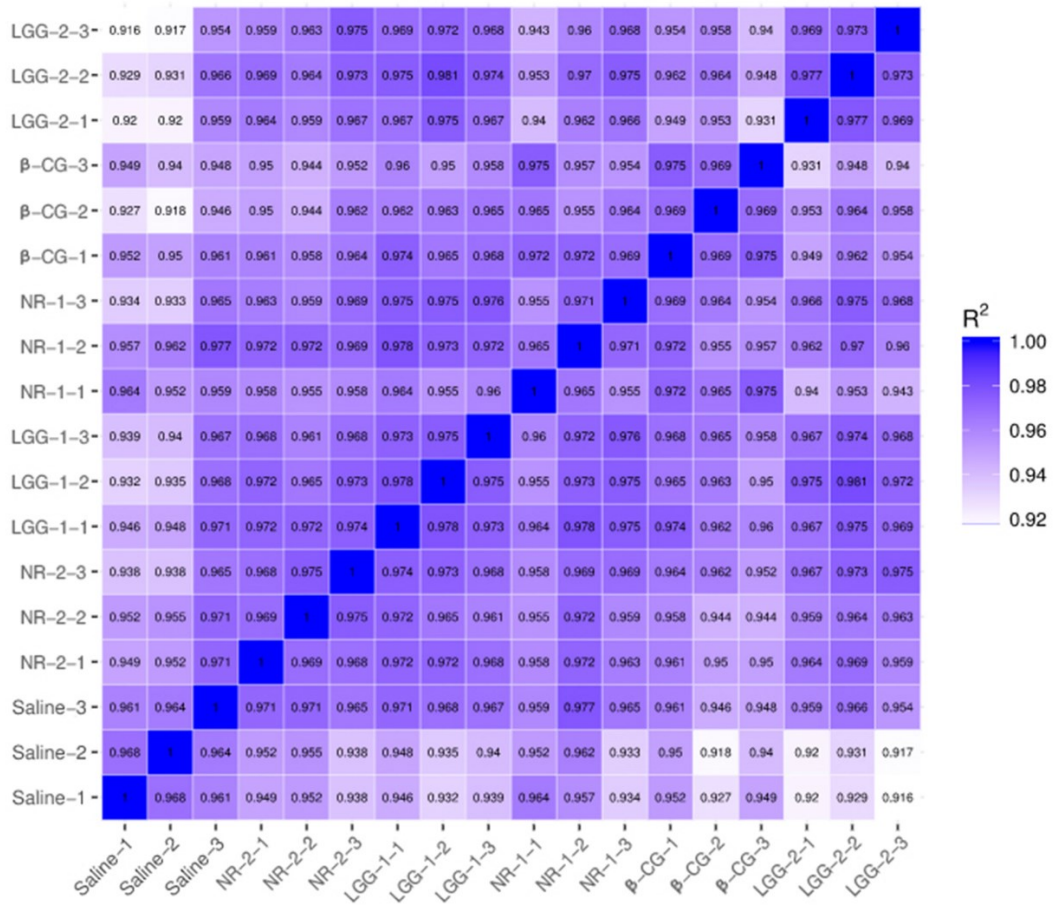

**Figure S2** Correlation of gene expression levels between samples in saline group, β-CG group, LGG-1 group, LGG-2 group, NR-1 group and NR-2 group based on RNA of spleen.

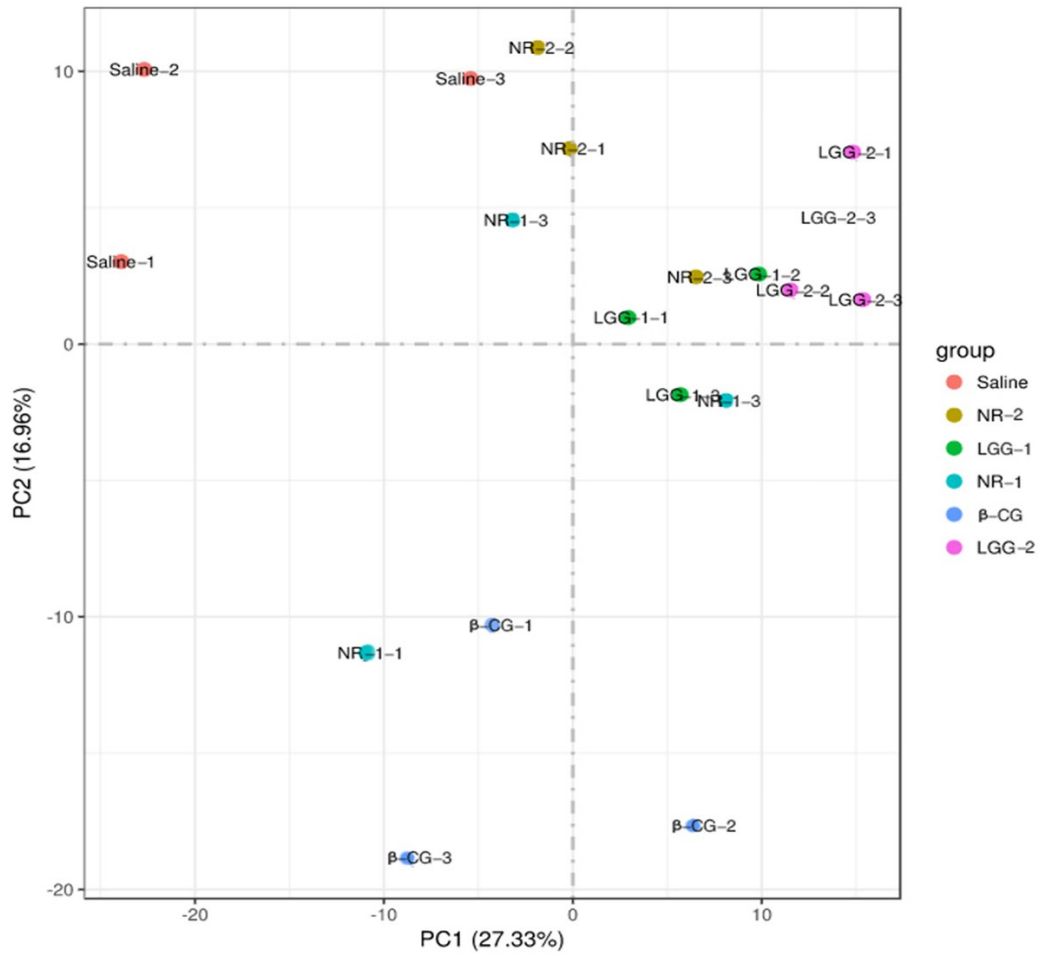

**Figure S3** Score plots (PC1  $\times$  PC2) of saline group,  $\beta$ -CG group, LGG-1 group, LGG-2 group, NR-1 group and NR-2 group based on the gene expression levels of spleen.
